# Supplementary material for: Seismic Risk: The Biases of Earthquake Media Coverage
Source: Copernicus journal article supplement (doi:10.5194/gc-2019-5), 2019-04-17
Supplement: Supplementary file [file gc-2019-5-AC2-supplement.pdf]

# 1 Seismic Risk: The Biases of Earthquake 2 Media Coverage

3  
4 **Maud H. Devès<sup>1,2\*</sup>, Marion Le Texier<sup>3</sup>, Hugues Pécout<sup>4</sup> and Claude Grasland<sup>4,5</sup>**

5 <sup>1</sup> Institut de Physique du Globe de Paris, CNRS UMR 7154, 75238 Paris Cedex 5, France –  
6 Université de Paris.

7 <sup>2</sup> Université Paris-Diderot, Centre de Recherche Psychanalyse Médecine et Société, CNRS EA  
8 3522 – Université de Paris.

9 <sup>3</sup> Université de Rouen Normandie – UMR CNRS 6266 IDEES, 76781 Mont-Saint-Aignan  
10 Cedex, France.

11 <sup>4</sup> CNRS, FR 2007 Collège international des sciences territoriales – Université de Paris.

12 <sup>5</sup> Université Paris-Diderot, UMR 8504 Géographie-Cités & FR 2007 CIST, 75006 Paris, France  
13 – Université de Paris.

14  
15 \*Corresponding author: Maud H. Devès ([deves@ipgp.fr](mailto:deves@ipgp.fr))  
16  
17  
18

## 19 **Abstract**

20 The capacity of individuals to cope with threatening situations depends directly on their  
21 capacity to anticipate what will come next. The media should play a key role in that respect,  
22 but an extensive analysis of earthquake media coverage by the international [news](#) reveals  
23 systematic biases. Exploring a corpus of 320 888 news articles published by 32 worldwide  
24 newspapers in 2015 in English, Spanish or French, we found that the press covers a very small  
25 number of events: 71% of the news [about seismic events](#) was dedicated to only 3 earthquakes  
26 (among the 1559 of magnitude 5+). A combination of frequency and content analysis reveals a  
27 typical framing of the ‘earthquake news’. Except for the ‘Nepal quake’, the duration of the  
28 coverage is usually very short. The news thus tends to focus on short-term issues: the event  
29 magnitude, tsunami alerts, human losses, material damage, and rescue operations. Longer-term  
30 issues linked to the recovery, restoration, reconstruction, mitigation and prevention are barely  
31 addressed. Preventive safety measures are almost never mentioned. The news on impacts show  
32 a peculiar appetency for death counts, material damage estimates and sensationalism. News on  
33 the response tends to emphasize the role played by the international community in helping the  
34 ‘poor and vulnerable’. The scientific content of the coverage is often restricted to mentions of  
35 the magnitude, with the concept of the seismic intensity being largely ignored. The notion of  
36 the ‘seismic crisis’ also seems unclear, with aftershocks sometimes being treated as isolated  
37 events. Secondary hazards are barely mentioned, except in the case of tsunami alerts. Together,  
38 these biases contribute to fatalistic judgments that damage cannot be prevented. If scientific  
39 messages are to be communicated, they should be broadcast a few hours after an event. Why  
40 not taking that opportunity to familiarize people with the real timeline of seismic disasters?  
41

42 **Keywords**

43 earthquake, media coverage, seismic risk, risk perception, international news flow theory

44

45

46

47 **Key Points**

48 • Analysis of earthquake media coverage by the international [news](#) reveals  
49 systematic biases in the coverage of seismic crises

50 • News focuses on a small number of events: in 2015, 3 earthquakes attracted 71%  
51 of the news (among 1559 earthquakes of magnitude over 5)

52 • The duration of the coverage is very short with respect to the issues at stake: from  
53 a few hours to a few days, rarely more

54 • The 2015 Nepal quake was exceptionally well covered both in terms of duration  
55 and number of news items

56 • There is a typical framing of ‘earthquake news’ in the international [news](#)

57 • News content focuses on short-term issues: the event magnitude, tsunami alerts,  
58 human losses, material damage, and rescue operations

59 • Longer-term issues linked to recovery, restoration, reconstruction, mitigation and  
60 prevention measures are barely addressed

61 • To reach the public, scientific messages should be released within hours of big  
62 events. Why not taking that opportunity to familiarize people with the real timeline  
63 of seismic disasters?

64

65

66

67

68

69 **1 Introduction**

70 **1.1 Newspapers play a key role in times of disaster**

71  
72 [Despite the increasing influence of social media, newspapers remain major gatekeepers in](#)  
73 [the process of selection and dissemination of the news proposed by press agencies to national](#)  
74 [and local audiences \(Harcup & O'Neill, 2017\). For risk managers, they remain an important](#)  
75 [tool for reaching a wide range of people \(Cottle, 2014\). To this respect, one can expect the press](#)  
76 [not only to inform, but also to provide the public with the knowledge to reduce disaster risks](#)  
77 [\(see for instance the Media kit created by the Asian Disaster Preparedness Center and the](#)  
78 [Department of Disaster Management and Climate Change of the Ministry of Natural Resources](#)  
79 [and Environment of Lao PDR, Thanthathep et al., 2016\).](#)

80  
81 Numerous studies have explored the ability of the news media to influence public  
82 perception. According to McClure et al. (2001) and Mc Clure and Velluppillai (2013), public  
83 education programs and news reports often describe disasters “in ways that accentuate the  
84 extent and severity of damage”, thus contributing to “fatalistic attributions and judgments that  
85 the damage cannot be prevented”. Improper attribution can hinder peoples’ preparedness:  
86 “When people attribute damage to an earthquake’s magnitude, they invoke an uncontrollable  
87 cause, but when they attribute damage to human design, they invoke a relatively controllable  
88 cause”. For authors such as Gaddy & Tanjong (1987) or Hiroi, Mikami, & Miyata (1985),  
89 understanding how the media report on disaster situations has direct implications as it shows  
90 “how [the] agencies [involved in disaster risk reduction] could reduce fatalism and facilitate  
91 preventive action by the way they present information about earthquakes and other disasters.”

92  
93 [It is not uncommon to hear scientists criticizing the press for conveying distorted messages](#)  
94 [\(e.g. Smith, 1996; Cocco et al., 2015; Harris, 2015a and b\). Journalists have even been accused](#)  
95 [of playing the role of “crisis catalyst” \(Boin et al., 2008\).](#) Comparing the news treatment of a  
96 real earthquake with that of a false quake prediction, Smith (1996) concludes that “the interest  
97 in drama at the expense of public affairs interferes with good scientific reporting.” In general,  
98 scientists denounce the tendency of the press to search for “culprits” and “accountability” and  
99 for “stirring up old rivalry and exaggerating conflicts” (Harris, 2015a and b). Harris (2015a)  
100 shows how the placement of the information in the frame of the pages, selection of stories, use  
101 of sources, selection of data, exaggeration, omissions and preferences for certain sources or  
102 pieces of information contribute to the oversimplification of [scientifically](#) complex arguments  
103 and an orientation toward information interpretations forcing inclination or prejudice for, or  
104 against, an argument, person or group, putting a particular emphasis on some aspects of the  
105 situation. [Harris \(2015b\) concludes that, what he calls the ‘media filter’, can influence the](#)  
106 [public understanding of scientific uncertainties and argues that a careful study of the media](#)  
107 [coverage would help scientists to communicate in a manner that reduces the chance of](#)  
108 [misunderstanding.](#) ↓

109 **1.2 Earthquake media coverage and international news flow theory**

110  
111

**Supprimé:** ¶  
From the social science and humanities perspectives, media do not just introduce biases into the perception of ‘real’ events, they also construct part of the reality (Searle & Willis, 1995). Media are primarily seen as being a cultural tool helping people to make sense of what happen to them, collectively. Among the few psychological studies focusing on the impacts of media coverage in a post-disaster context, Yoshida et al. (2016) suggest that watching the news may even help people to recover from their traumatic experiences, as it provides a good opportunity for deliberate rumination over disaster-related memories. Studying two Canadian rural communities following a forest fire in 2003, Cox et al. (2008) show that the newspaper coverage acts as “a local as well as a broader cultural resource for affected individuals and communities in determining the ‘correct’ way of responding to and recovering from the disaster”. Their analysis emphasizes the power of media “to convey and normalize dominant cultural assumptions” and influence social attitudes and health-related behavior (Gaddy & Tanjong, 1987). It points out the effect of the neoliberal discursive framing of recovery, emphasizing the economical-material aspects of the process and a reliance on experts. Cox and Perry (2011) shows that the dominant discursive constructions of disasters have drawn on and reinforced a hierarchy of credibility in which local voices are marginalized in favor of experts.

138 [This study, led by a pluri-disciplinary team of researchers coming from geophysics,](#)  
139 [psychology and geography, builds on previous results \(Devès, 2015; Grasland et al., 2016; Le](#)  
140 [Texier & al., 2016\) to address the following question: \*in a globalized world, can we find\*](#)  
141 [systematic trends in how the international news published by daily newspapers covers](#)  
142 [earthquake events?](#)

143 [By ‘international news’, we mean news published by daily newspapers about foreign](#)  
144 [countries or, in practical terms, news published by newspapers through specific RSS flows](#)  
145 [entitled “international” or “world”.](#) Many hypotheses about the rules governing the  
146 international news flow were formulated more than 50 years ago (Galtung & Ruge, 1965;  
147 Östgaard, 1965) and verified by empirical studies concerning the unequal salience of countries  
148 in the media and the effects of size, proximity and the preference for elite countries or negative  
149 news (Peterson, 1981; Kim & Barnett, 1996; Wu, 2000). The development of new forms of  
150 electronic communication has not modified the rules previously observed, and recent works  
151 confirmed that the circulation of international news is still very influenced by cultural factors  
152 such as language and physical factors such as the distance between the location of the media  
153 and the location of events (Segev, 2016; Grasland et al., 2016). However, the salience of  
154 countries is generally manifested over a mixture of heterogeneous events, and some authors  
155 have focused on subsets of events that are either mentioned or ignored by the media. The event-  
156 oriented approach is based on a selection of foreign news related to a specific topic for which  
157 it is possible to define a finite and possibly objective list of events occurring in the “real” world.  
158 One of the most interesting areas of research from this perspective is the study of the media  
159 coverage of earthquakes, for which objective measures of the magnitude or victims are regularly  
160 published. [It is thus possible to analyze the level of newsworthiness according to the general](#)  
161 [laws postulated by Galtung and its followers \(Galtung & Ruge, 1965; Harcup & O’Neill, 2001,](#)  
162 [2017; Wu, 2000\) and their specific application to earthquake media coverage \(Koopmans &](#)  
163 [Vliegenthart, 2010\).](#) Examining the news media coverage of more than 900 earthquakes, Le  
164 Texier et al. (2016) showed that the event severity (reported [in the press](#) as a moment  
165 magnitude) affected the volume of media coverage following a power law. Studying the  
166 dynamics of public interest in major earthquakes using Google Trends, Tan & Maharjan (2018)  
167 find that the duration and search peak vary with the death toll and damage but not with the  
168 earthquake magnitude. Earle et al. (2010) found the same pattern for the 2009 Mw 4.3 Morgan  
169 Hill (California) earthquake using Twitter data, in a period of only a dozen minutes.

170 [This paper goes further in questioning the existence of systematic trends in how](#)  
171 [earthquakes are covered by international news. More specifically, we look into the temporal](#)  
172 [dynamics of the coverage \(duration, trends\) and into the potential existence of a typical framing](#)  
173 [of ‘earthquake news’ \(i.e. by comparing news content between events and between newspapers](#)  
174 [from various countries and languages\). Section 2 presents the datasets we use and the main](#)  
175 [steps we follow for data analysis. First, we analyze the intensity, time distribution and content](#)  
176 [of a large corpus of approximately 320 888 news items published by 32 international news](#)  
177 [media RSS feeds in 2015. Second, we associate a statistical analysis of the news frequency with](#)  
178 [a textual analysis of the content of the news.](#) Section 3 [describes the main results. Those are](#)  
179 [discussed in Section 4. Section 5 concludes.](#)

180

181 **2 Materials and methods**

182

183 **2.1 Presentation of the datasets**

184 The datasets run from January 1, 2015 at 00:00:01 to December 31, 2015 at 23:59:59. 2015  
185 is particularly interesting as it is the year of the Nepal [quake](#), a major event well covered by the  
186 international [news published by daily newspapers](#). The *geophysical dataset* is built from the  
187 online seismic catalogue provided by the [United States Geological Survey \(USGS\)](#). [For each](#)  
188 [earthquake, we collect the following parameters: hypocenter, magnitude and label](#). The *media*  
189 *dataset* is built from the ANR corpus GEOMEDIA, which contains information published by  
190 more than 330 news RSS feeds from 180 media, localized in 61 countries and written in 10  
191 languages over three years ([ANR-12-CORP-0009](#), Grasland et al., 2012-2015). We selected  
192 international [news](#) media RSS feeds based on several criteria: [national or international status of](#)  
193 [newspapers \(broadsheet newspapers\)](#), RSS feed regularity, media localization, and the volume  
194 of transmitted information ([see the supplementary information of Grasland, 2019](#)). The final  
195 corpus consists of 32 RSS feeds related to international news in three languages (English,  
196 French and Spanish) that are equitably geographically distributed, according to the possibilities  
197 offered by the initial database (Figure 1). [Analysis have been completed using the software R,](#)  
198 [and notably the package tm for text mining](#).

199

200 (insert Figure 1 – currently located at the end of the document)

201

202 **2.2 Data cleaning and selection through tagging**

203 Before starting the data analysis, three processing steps were required (Figure 2). First,  
204 some of the selected RSS [news](#) items were not worth analyzing because they were totally devoid  
205 of information, simply advertising or summarizing a heterogeneous set of news of the day.  
206 These items were deleted from the corpus. Second, the initial database continuously collects  
207 RSS items on newspaper websites, and a similar item can be published several times without  
208 changes. Therefore, we had to delete all the duplicate items (items with the same title and text).  
209 During these two processing steps, more than 60 000 [news](#) items were deleted. After the  
210 cleaning, the dataset contains 320 888 news items. To build the joint corpus (called EQ-MEDIA  
211 in the following), we then enriched the [news](#) media dataset with a tagging process in two steps:  
212 1) the geographical tagging of all mentioned countries using word dictionaries and 2) the  
213 thematic tagging of all news mentioning a seismic event using an ‘earthquake dictionary’. The  
214 first dictionary was tested and validated in previous research (Grasland [et al.](#), 2016). The latter  
215 has been tested manually on 1% of the total number of [news](#) items to determine the number of  
216 false positives (i.e., items containing metaphoric references to earthquakes such as a ‘political  
217 earthquake’). We found a reasonable error rate of approximately 4%. The rate of false negatives  
218 (i.e., missed items) was even smaller (approximately 2 to 3%). The final number of news items  
219 dedicated to earthquakes over the year 2015 is 4411, which represents 1.37% of the total  
220 number of [news](#) items published during that time period by all the RSS feeds of the corpus.

221 (insert Figure 2)

222

223 **2.2 Two levels of analysis: the year 2015 and 3 major events**

224 An analysis of the intensity and duration of coverage is undertaken on the whole  
225 EQMEDIA corpus. The analysis of the news content, which requires coupled qualitative and  
226 quantitative approaches, is undertaken on a selection of earthquakes. As shown in Figure 3, the  
227 ‘earthquake news’ is not evenly distributed over time. Three earthquakes garnered the most  
228 attention:

- 229 • *the Gorkha earthquake*: Nepal and neighboring countries witnessed a 7.8 magnitude  
230 earthquake on the 25<sup>th</sup> of April 2015. It was followed by many aftershocks, among which  
231 one on May 12<sup>th</sup> had a magnitude of 7.3. These earthquakes killed more than 9,000 people  
232 and affected at least 8 million, affecting the main economic and political center of the  
233 country (Katmandu) and causing massive economic losses (half of the GDP of the country)  
234 (CRED, 2017). The first quake (April 25<sup>th</sup>) was the most devastating. It also triggered  
235 landslides and avalanches in the mountains, killing hundreds of people, among whom were  
236 foreign tourists whose fates most interested the [news](#) media. The magnitude of the main  
237 shock was similar to that of the 1934 earthquake.
- 238 • *the Iapel earthquake*: An earthquake of magnitude 8.3 hit the area of Iapel, Chile, on  
239 September 9<sup>th</sup>, 2015, killing at least 15 persons and affecting thousands. Chilean authorities  
240 ordered the immediate evacuation of the coast due to a tsunami threat. Pacific-wide tsunami  
241 warnings were issued, and the evacuation affected approximately 1 million people.
- 242 • *the Hindu Kush earthquake*: An earthquake of magnitude 7.5 hit the Hindu Kush region  
243 between Afghanistan and Pakistan on October 26<sup>th</sup>, 2015. The earthquake and its  
244 aftershocks killed approximately 400 people and affected thousands in Afghanistan,  
245 Pakistan and the neighboring countries (including India and Tajikistan).

246  
247 (insert Figure 3)

### 248 **2.3 Analyzing the news content**

249 To more closely examine our dataset, we adopted a method inspired by Cox et al. (2008)  
250 who analyzed the print-news media coverage of the recovery process following a forest fire.  
251 The first step is to conduct a careful analysis of the content of the news itself to identify thematic  
252 patterns but also possible “textual silences”, defined by Huckin (2002) as “the omission of some  
253 piece of information that is pertinent to the topic at hand”. As we are dealing with thousands of  
254 [news](#) items, this qualitative approach is complemented by a quantitative analysis based on  
255 keywords.  
256

257  
258 It was possible but ultimately not relevant to proceed to a classification of the content of  
259 our thousands of [news](#) items with inductive exploratory methods such as cluster analysis  
260 (Wilks, 2011) or latent Dirichlet allocation (Blei & al., 2003). Thus, we chose a deductive  
261 approach where we tried to extract from the [news](#) media coverage the categories or concepts  
262 defined by experts on disasters. Following Hass, Kates and Bowden (1977) and Kates et al.  
263 (2006), we define six *expected categories of content*: hazards, impacts, response, restoration,  
264 reconstruction and preparedness. The category of *hazards* refers to the seismic phenomenon  
265 itself or to any hazardous event it can trigger such as tsunamis or landslides. The category of  
266 *impacts* refers to the immediate effects of these hazards: human loss, injuries, and damage to  
267 buildings and infrastructures. The category of *emergency response* refers to the actions taken

Supprimé: toward critical discourse analysis

269 during or immediately after the earthquake to save lives, reduce health impacts, ensure public  
270 safety and meet the basic subsistence needs of the people affected. The category of  
271 *rehabilitation* includes recovery and restoration, i.e., actions taken to restore basic services and  
272 facilities and improve the livelihoods and health, as well as economic, physical, social, cultural  
273 and environmental assets, systems and activities, of the earthquake-affected community. By  
274 *reconstruction*, we mean the medium- and long-term rebuilding and restoration of the critical  
275 infrastructures, services, housing, facilities and livelihoods. *Preparedness* refers to actions  
276 carried out to build the capacities needed to efficiently manage future emergencies. News may  
277 refer to one or several of these categories of content.

278  
279 We classify the most frequently used words of the ‘earthquake news’ into one of these  
280 categories of content and build two keyword dictionaries: a *discourse content dictionary*  
281 corresponding to the above categories (table 1) and an *identity matrix* dedicated to actors (table  
282 2). For this work to be manageable in a reasonable time, we adopt a threshold of a minimum of  
283 4 occurrences in French and Spanish and 8 in English (there are, respectively, 619 and 478 [news](#)  
284 items in Spanish and French, so the threshold remains very low, as it corresponds to words  
285 occurring in at least 0.36% of the [news](#) items. There are 2097 items in English, and thus the  
286 threshold remains sensibly the same: it corresponds to words occurring in at least 0.38% of the  
287 [news](#) items). Conjunctions and adverbs are not considered, and words with common roots are  
288 treated together. We use words that are representative of one and only one of our categories of  
289 discourse (principle of exclusivity) and that do not introduce too many false positives. Tagging  
290 the database using these two keyword dictionaries allows us to quantify the presence/absence  
291 and evolution of each theme/subtheme/topic. There are limitations to this keyword approach  
292 ([the meaning of isolated words is often ambiguous and related to the context and the position](#)  
293 [before or after other words, e.g. Church & Hanks, 1990](#)) but the independent classification of  
294 the [news](#) items by the coauthors indicates a good consistency in the coding of themes and  
295 subthemes and the identification of topics (we reach a maximum of 12% of differences for the  
296 emergency response category).

297  
298 (insert table 1 and table 2)

299

### 300 **3 Results**

301

#### 302 **3.1. ‘Earthquake news’ analysis of temporality**

303 News concentrates on a very small number of earthquakes. 71.4% of the [news](#) items [about](#)  
304 [seismic events](#) were dedicated to [only](#) three earthquakes (Figure 3). The ‘Nepal Quake’ was  
305 exceptionally well-covered, representing 59.7% of the news, and the earthquakes in Chile  
306 (Ilapel) and Afghanistan (Hindu Kush) collected, respectively, 6.1% and 5.8% of the news. The  
307 other events of the year (some of which are visible as small peaks in the brown curve of Figure  
308 3) share the remaining 28.6% of the coverage.

309

310 The curves of coverage intensity exhibit a similar trend for all earthquakes: the initial peak  
311 is followed by an exponential decrease. This signature has been proved as typical of the media

312 coverage of dramatic events, characterized by an initial shock to public opinion (Boomgaarden,  
313 H. G. & de Vreese, 2007). The amplitude of the initial peak is higher in the case of the ‘Nepal  
314 Quake’ than in the other cases. The duration of the coverage is also much longer with a second  
315 peak, corresponding to the aftershock of May 12<sup>th</sup>, triggering a new round of coverage. This  
316 may be explained by various factors, including a death toll an order of magnitude higher and  
317 that it affected the economic and political center of a touristic country (Koopmans &  
318 Vliegenthart, 2010). However, despite these differences in intensity and duration, the overall  
319 signature of the ‘Nepal quake’ is similar to the signature of the Hindu Kush earthquake, likely  
320 because both events occurred in similar geodynamical settings (i.e., intracontinental faulting)  
321 and both caused massive impacts (i.e., huge death tolls and vast material damage). The real  
322 question is why the Chilean earthquake, which only caused moderate impacts, was so well  
323 covered. Occurring in a different geodynamical setting (i.e., subduction faulting), the  
324 earthquake triggered tsunami waves threatening many countries on the ocean rim. The release  
325 of the tsunami alert explains the level of the international coverage in remote countries. All  
326 together, these observations support earlier works showing that the death toll in itself is not  
327 sufficient to predict the volume of media coverage, as other factors – such as the physical,  
328 political, or economic distance to the place of publication – also influence the newsworthiness  
329 of disasters (i.e., Adams (1986), Simon (1997), and Van Bell (2000), among others).

330

331 Eventually, the main peaks of intensity are not significantly different among the English,  
332 Spanish and French newspapers. Only small differences are observed, essentially on the extent  
333 of the main peaks or on the secondary peaks. The similarity of the results obtained in the three  
334 different languages confirms the robustness of our methodology. It also suggests the existence  
335 of a typical *and global* framing of the ‘earthquake news’, inviting us to dive deeper into the  
336 analysis of content.

337

### 338 3.2. ‘Earthquake news’ analysis of content

#### 339 3.2.1 News reproduces the categories of content expected from Disaster Risk 340 Management (DRM) models

341 The ‘earthquake news’ content broadly reproduces the sequence expected from DRM  
342 models but with an important bias: the duration of coverage is too short (hours to days) for mid-  
343 to long-term issues (weeks to months or years) to be well-covered (Figure 4). The themes of  
344 *Hazards, Impacts* and *Emergency Response* are overrepresented compared with those of  
345 *Recovery, Restoration, Reconstruction* and *Preparedness* (Figure 5).

- 346 • 77% of the news items contain a general description of the *Impacts* of the event,  
347 either simply to outline its level of destructivity or to count fatalities.
- 348 • 46% of the news items refer to the *Hazards*, often to communicate the magnitude  
349 of the earthquake but sometimes to inform about secondary hazards such as  
350 tsunamis, aftershocks and, more rarely, avalanches, mud slides or floods.
- 351 • 45% of the news items refer to *Emergency response* describing either aid, search  
352 and rescue operations (in the case of the Nepal and Hindu Kush earthquakes) or  
353 the release and lifting of tsunami warnings (in the case of the Ilapel earthquake).
- 354 • Only 5.6% of the news items refer unambiguously to *Recovery, Restoration and*  
355 *Reconstruction*, and none refer directly to issues of *Preparedness*. These low



356 percentages are partially due to the small numbers of keywords identified for each  
357 of these themes, but it is the low frequency of these themes in the database that  
358 prevented us from identifying more keywords.

359 It is interesting to note that the big aftershock of May 12<sup>th</sup> in Nepal triggered a new cycle  
360 of information. Although characterized by a peak of smaller intensity, the news content  
361 followed a similar sequence to the one triggered by the main shock.

362 Figure 6 shows the temporal distributions of these themes. The Nepali and the Afghani  
363 earthquakes have similar signatures: content on hazards comes first, very soon followed by  
364 content on impacts; content on response comes next, and content on recovery, rehabilitation  
365 and reconstruction comes later on – when it comes. The Chilean earthquake has a significantly  
366 different signature, which is due to its tsunamigenic character. The news focuses first on the  
367 hazards including tsunamis, which makes the content on the response (tsunami warnings)  
368 appear much earlier.

369  
370 (insert Figures 4, 5 and 6)

371

### 372 3.2.2 The typical ‘earthquake news’

373

374 To give a sense of the framing of ‘earthquake news’, in the following, we build an (artificial  
375 but well-informed) example of the evolution of the news content over time after an event. Of  
376 course, there are to be variations due to elements of context, but our guess is that the main trends  
377 would remain comparable.

378

379 Imagine that an important earthquake occurs...

380

- 380 • **Within a few hours**

381

382 The news focuses on the description of the seismic hazard and, when relevant, passes on  
383 information about tsunami warnings. The news first reports that an earthquake has been felt,  
384 providing an approximate location of the impacted area (often a country, sometimes a region  
385 or a city). Many recall the magnitude of the event.

385

e.g., ‘USGS: Magnitude 7.5 earthquake strikes Afghanistan’ (USA today, October 26th, item  
386 10366718), ‘Un terremoto de 7,9 grados sacude el centro de Nepal’ (Faro de Vigo, April 25th, item  
387 6369528), ‘Un séisme de magnitude 7,5 a secoué lundi le massif de l’Hindu Kush’ (Le Monde,  
388 October 26th, item 10368842)

389

390 It quickly becomes clear that the event is worth mentioning because it had noticeable impacts.

391

e.g., ‘La ONU advierte dramático impacto tras nuevo temblor en Nepal’ (El informador, May 13th,  
392 item 6774985), ‘Scores of people were killed when a 7.5-magnitude earthquake centered in  
393 Afghanistan rocked neighboring Pakistan and rattled buildings as far away as India.’ (USA Today,  
394 October 26th, item 10371195)

395

396 The combination of the location and magnitude is often use to ‘label’ the event and  
397 distinguish it from other ones. After a few days, ‘big’ events are known by their ‘nicknames’,  
398 and the magnitude is less often mentioned. A few hours after the main shock, journalists named  
399 the earthquake the ‘Nepal earthquake’, and it soon became the ‘Nepal Quake’.

400 e.g., ‘5 things to know about the Nepal earthquake’ (The Star, April 25<sup>th</sup>, item 6376436) ‘Nepal  
401 quake: 7.9 magnitude tremor hits near Kathmandu’ (The Guardian, April 25<sup>th</sup>, item 6370804)  
402 However, only a few earthquakes become famous enough to be called by nicknames; the  
403 Chilean and Afghani earthquakes of 2015 did not, and the news settled for recalling the country  
404 and magnitude of the main shocks.  
405

406 Interestingly, that initial phase of coverage is also the phase with most scientific content.  
407 The extensive use of the notion of magnitude, although often made at the expense of the notion  
408 of seismic intensity, testifies to the successful transfer of a geophysical notion to the lay public.  
409 We should also outline here that aftershocks are sometimes treated as singular events by the  
410 press, with the notion of a seismic crisis remaining unclear to many. Among the most cited  
411 expert bodies, the USGS is the most visible internationally, as it provides immediate  
412 information about the earthquakes. Regionally important centers such as [national](#)  
413 [meteorological agencies and emergency operations centers, etc.](#) can also be cited.  
414

415 Secondary hazards are barely mentioned in the news, except for tsunamis. In Chile, the  
416 news passed on very well the information about tsunami warnings, mentioning at the same time  
417 the primary and the secondary hazards and the authorities’ response to it:

418 e.g. ‘Tsunami warnings in Chile and Peru as 8.3 quake hits’ (Daily Telegraph, September 17<sup>th</sup>, item  
419 9501990), ‘The tsunami warning from New Zealand’s Ministry of Civil Defence & Emergency  
420 Management after a big quake off Chile will affect a night surfing event.’ (The Age, September  
421 17<sup>th</sup>, item 9504366).  
422

423 • **Few hours to few days after the event**

424 The peak of coverage is reached within a few hours to a day after the event, with many  
425 updates of the same news including more and more precision or detail. Earthquake events  
426 become ‘breaking news’ or ‘top stories’ and are disseminated simultaneously on different RSS  
427 feeds. Most news talk about impacts, especially human losses. The description of the impacts  
428 is the theme that attracts the most coverage. 76.7% of the news of our corpus focuses on the  
429 description of the impacts (81% for the three considered earthquakes). 34.3% focus on human  
430 losses, and only 17.3% on material damage. Messages about human impacts adopt a factual  
431 tone and evolve following a rather systematic pattern.

432 For illustration, we provide an example of the treatment by *The Guardian* of the ‘Nepal  
433 Quake’. The news starts by mentioning the occurrence of an event with fatalities:

434 e.g., ‘Fatalities as earthquake hits Nepal’ (The Daily Telegraph, April 25th, 09:19, item 6371294)

435 Within a few hours, the regular update of the human losses starts:

436 e.g., ‘Nepal earthquake: more than a hundred people dead’ (The Guardian, April 25th, 12:04,  
437 item 6371816), ‘Nepal earthquake: nearly 700 people dead’ (The Guardian, April 25th, 13:42,  
438 item 6373501), ‘Nepal quake: more than 1,000 people dead after tremor near Kathmandu’ (The  
439 Guardian, April 25th, 17:44, item 6381853)

440 As the hours go by and the numbers continue to rise, concurrent topics start emerging.  
441 Stories become more personalized and the news starts referring to distinct categories of victims  
442 (famous people, nationals, vulnerable ones, etc.):

443 e.g., ‘Nepal quake kills more than 1,000 and spreads terror on Everest’ (The Guardian, April 26th,  
444 00:23, item 6382569), ‘Google executive Dan Fredinburg filmed at Everest base camp before

445 death' (The Guardian, April 26th, 16:49, item 6396313)), 'Népal: le bilan des victimes françaises  
446 pourrait s'alourdir' (Le Parisien, May 3rd, item 6542461)

447 **Aid and rescue operations and life conditions start attracting interest:**

448 e.g., 'Nepal earthquake: rescue continues as death toll exceeds 2,500' (The Guardian, April 26th,  
449 18:18, item 6397229), 'Nepal earthquake: thousands seek shelter as death toll exceeds 2,500'  
450 (The Guardian, April 27th, 2:04, item 6402976)

451 **As the days go by, the death toll appears less frequently, with the news reporting official  
452 numbers only when those are updated:**

453 e.g., 'Nepal earthquake death toll exceeds 4,000 with many still missing. More than 4,000 are  
454 confirmed dead and 6,500 injured...' (The Guardian, April 28th, item 6430398)

455 **Proportionally, there is a lack of interest in injuries and general health issues (with  
456 psychological issues even more ignored).**

457  
458 **During the phase of coverage dedicated to impacts, we observe a tendency to  
459 sensationalism. Almost half of the news items use superlatives such as 'devastating',  
460 'powerful', 'catastrophic', 'enormous', 'dramatic', 'monster', or 'violent', etc., emphasizing  
461 the extent of the devastation. Surprisingly, terms referring directly to emotions (such as 'fear',  
462 'desperation', 'panic', 'courage', etc.) remain rare.**

463 e.g., 'Nepal's second monster quake' (The Australian, May 12<sup>th</sup>, item 6749166), 'As rescue efforts were  
464 hampered by bad weather, dramatic details emerged about the devastation at the base camp in the wake  
465 of an avalanche' (The New York Times, April 28<sup>th</sup>, item 6423784), 'Nepalíes cavaron con sus manos para  
466 sacar a sobrevivientes de montañas de escombros. Pánico. Lágrimas. Miedo. Todos estos sentimientos  
467 se conjugaron ayer como parte de la jornada trágica que vivieron los miles de nepalíes que habitan  
468 Katmandú, y es que tras el fuerte terremoto de 7.8 grados en la escala de Richter que dejó en el país al  
469 menos mil 475 muertos [...] los sitios históricos están completamente devastados' (La cronica de hoy,  
470 April 26<sup>th</sup>, item 6387254), 'vías de comunicación completamente sepultadas por corrimientos de tierra y  
471 rocas' (La cronica de hoy, October 27<sup>th</sup>, item 10394058), 'En el barrio de Gongabu, completamente  
472 arrasado, fallecieron 500 de las 8.000 víctimas del terremoto' (El Pais, May 13<sup>th</sup>, item 6779435),  
473 'Reportage dans des villages coupés du monde, dévastés par la catastrophe, où les secours peinent à  
474 arriver comme l'aide des autorités.' (Le Monde, April 28<sup>th</sup>, item 6434796)

475  
476 • **Within a few days after the event**

477 **The focus slides from impacts to response operations. 45.2% of the news of our corpus  
478 refer to that category (Figure 5). In the case of a tsunami alert, the theme of response operations  
479 appears earlier in the coverage, as the news passes on information about warnings and, if  
480 relevant, mass evacuations. In the absence of a tsunami threat, the news focuses on aid, search  
481 and rescue operations. In that case, evacuation and displacement are generally undercovered.**

482 e.g., 'Rescue teams dig for Nepal quake survivors' (USA Today, April 27th, 6401498); 'Rescuers were  
483 struggling to reach quake-stricken regions in Pakistan and Afghanistan on Tuesday as officials said  
484 the combined death toll from the previous day's earthquake rose to 339.' (The Times of India,  
485 October 27th, item 10393016), 'FRANTIC rescue efforts to save people trapped under rubble are  
486 taking place after a 7.9 magnitude earthquake hit near Nepal's capital, Kathmandu.' (Daily  
487 Telegraph, April 25th, item 6372184)

488 **First, the messages adopt a general tone, becoming more specific when the international  
489 community starts sending help:**

490 e.g., 'China's rescue team pulls first survivor out of debris after Nepal quake' (China Daily, April  
491 27th, item 6409965), 'The burly Californian and fellow members of a disaster response team  
492 deployed by the U.S. Agency for International Development were looking, against all odds, for

493 collapsed buildings' (The Los Angeles Time, May 1st, item 6499637), 'Turkish rescue workers in  
494 Kathmandu, Nepal pulled a man alive from the rubble of a destroyed building on Monday.' (USA  
495 Today, April 27th, item 6414192).

496  
497 We note a tendency of the international [news](#) to glorify the contribution of the international  
498 community to help the 'poor and vulnerable'.

499 [e.g.](#) 'As world leaders and global charities tried to grasp the scope of an earthquake that  
500 devastated Nepal, they offered condolences for the nearly 1,400 people killed and readied  
501 emergency aid for the survivors. Mountaineering groups struggled to check on climbers, and  
502 Nepalese abroad did their best to reach families in the stricken area.' (The Times of India, April  
503 26<sup>th</sup>, item 6382872), 'With the help of Los Angeles firefighters, rescuers Thursday pulled a teenage  
504 boy from the wreckage of a nine-story Katmandu hotel that collapsed around him five days ago  
505 when an enormous earthquake shook Nepal.' (The Los Angeles Times, April 30<sup>th</sup>, item 6494627)

506  
507 Rescue operations are also an occasion for relating personal stories, if not miraculous ones.  
508 e.g., 'Google executive Dan Fredinburg filmed at Everest base camp before death' (The Guardian,  
509 April 26<sup>th</sup>, item 6396313), 'Boy found alive 5 days after Nepal quake' (The Age, April 30<sup>th</sup>, item  
510 6481498)

511 Such stories can take different forms depending on context. In Nepal, one finds several  
512 stories about 'children saved from the rubble' (The Guardian, April 30<sup>th</sup>, item 6480552). In  
513 Afghanistan, stories focus on 'twelve girls caught in a stampede while trying to escape from  
514 their school' (Daily Telegraph, October 26<sup>th</sup>, item 10367166).

515  
516 At that stage, the duration of coverage plays an important role in the richness of the content  
517 of the news. The coverage of the 'Nepal Quake' is longer and richer: the living conditions,  
518 internal displacement, epidemic risk, and mass cremation are all issues that are not at all  
519 addressed in the coverage of the other earthquakes.

520  
521 • **Few days to few months after the event**

522 The coverage intensity has faded out, impeding the proper coverage of long-term issues  
523 (Figure 4). Few [news](#) items refer to *recovery*, which tends to cover distinct temporalities, from  
524 a few days to several months (Figure 5).

525 e.g., 'Nepalese villagers clean up four days after a monster earthquake killed more than 5,000  
526 people in the Himalayan nation' (USA today, April 29th, item 6462063), 'The International  
527 Federation of Red Cross and Red Crescent Societies warned on Friday that longer-term support is  
528 needed to help shattered communities recover six months after a magnitude 7.8 earthquake  
529 struck Nepal.' (China Daily, October 10th, item 10361489)

530 The theme of *reconstruction* is dedicated to more permanent repairs and rebuilding. There  
531 are enough [news](#) items referring to that theme for us to identify a few keywords, but the  
532 coverage remains poor (Figure 5). There are again different temporalities. In the short term, the  
533 news reports that people are rebuilding their homes. In the longer term, the news reports the  
534 reopening of public infrastructures such as schools, hospitals and historical buildings as a sign  
535 of returning to normal life.

536 e.g., 'Survivors in quake-hit Pakistan seek help to rebuild homes' (Times of Malta, October 28th,  
537 item 10408082), 'Hundreds of thousands of Nepalese children have returned to school in Nepal

538 for the first time since two earthquakes last month killed more than 8,700 people and injured  
539 23,000...' (The Guardian, May 31st, item 7161853)

540

541 • **A window of communication for scientists**

542 According to Haas et al. (1977), the second and longer phase of reconstruction corresponds  
543 to the continuing assessment of hazards and risks and structural and nonstructural  
544 improvements to reduce the impact of future events (i.e., mitigation and adaptation measures,  
545 prevention). This phase lasts many years, during which attempts are made not only to recover  
546 but to improve the state of living, and society devotes some attention to the construction of  
547 memorials or the institutionalization of a narrative memory of the event. We could not find  
548 enough [news](#) items referring to mitigation, adaptation and prevention to identify keywords.  
549 There are, however, a few items referring to a narrative dimension: the ones that place the event  
550 in a country's history.

551 e.g., 'El terremoto fue el sexto mayor movimiento telúrico en la *historia* de Chile y el de mayor  
552 intensidad en el mundo durante 2015.' (El Universal, September 17th, item 9516610)

553 A few [news](#) items also mention the lessons learned (or not learned) from past events.

554 e.g., 'Nepal earthquake: learn lessons or more will die in future disasters, warns expert' (The  
555 Guardian, April 29th, item 6460947), 'How Nepal can avoid the mistakes of Haiti' (The Guardian,  
556 May 12th, item 6745299)

557 By doing so, the press contributes to maintaining a form of knowledge about existing risks.  
558 That contribution to the collective memory often happen just after the main shock (or after large  
559 aftershocks). It is also a time when the press listens to experts, and so it might be a good window  
560 for communication. People are looking for elements to make sense of what has just been going  
561 on. [This time window could be used to reinforce preparedness in the general population, as  
562 news about a disastrous earthquake – even located far away – may momentarily alter the feeling  
563 of safety among readers \(Wood et al. 2012\).](#)

564

565 **3.2.3 The figures of 'earthquake news'**

566 The identity matrix allows the identification of the categories of actors that are the most  
567 present in the news. 44.2% of the news mentions the people affected by the earthquake. The  
568 exact terminology varies with time. 'Those affected' start as 'victims' to become 'rescued',  
569 'survivors' and then 'locals' or 'villagers'. 6% of the news refers explicitly to vulnerable  
570 persons.

571 27.7% of the news mentions state representatives who are responsible for organizing the  
572 public response, but regional and local public services are absent (Figure 5). Surprisingly, only  
573 8% of the news refers to civil and military security services and 7.7% to rescuers in general.  
574 3.8% of the news mentions UN agencies, and 2.5% international aid. Only 5.4% of the news  
575 refers to experts, specialists or scientists, mostly during the initial phase of coverage after the  
576 main shock and after the big aftershock in the case of the Nepal Quake. The private sector is  
577 rarely mentioned, except Google and Facebook for their people finder tools. Other figures  
578 emerging from the 'earthquake news' are 'famous unknowns' whose stories serve to exemplify  
579 the experience of the affected people. The news sometimes refers to famous personalities, either  
580 because they are among the victims or because of their generous donations. It is interesting to  
581 observe that local communities and their representatives are almost absent from the news. [That](#)

582 [confirms one classical rule of newsworthiness about preference for elite people and celebrities](#)  
583 [\(Galtung and Rudge, 1965; Harcup and O’Neill, 2001 and 2017\).](#)  
584

#### 585 **4 Discussion**

586 Studying earthquake coverage at the global scale, we reach different conclusions from  
587 authors such as Rovai and Christine (1998). Among the 7 136 earthquakes of magnitude 4.5+  
588 occurring in 2015, we indeed observe significant differences in coverage: most events are not  
589 reported by the [news](#) media, except a few that are particularly well-covered. However, once  
590 events are covered, we observe an astonishing homogeneity in the news content. There are, of  
591 course, variations in the way journalists treat the information - editorial choices and cultural  
592 proximity with the impacted countries are both parameters influencing the duration and content  
593 of the coverage - but these variations remain small. Our results suggest that there is a typical  
594 framing of earthquake in the international [news](#).

595 This framing seems to introduce major biases in the representation of the seismic risk. A  
596 first bias is linked to the short duration of the coverage. Analyzing Googling trends, Tan et al.  
597 (2018) confirm our empirical observation that the peak of public interest after destructive  
598 earthquakes follows an exponential temporal decay. The same tendency was observed for  
599 smaller events by Earle et al., 2010. Our results complement these findings in showing that the  
600 international online journals follow the same tendency. However, we go further than previous  
601 studies in exploring the consequences of that exponential decay on the news content. It focuses  
602 the information on short-term issues such as the description of the hazard and of its impacts and  
603 emergency operations. The mid-term and long-term issues of recovery, restoration,  
604 reconstruction, adaptation, mitigation and preparedness are largely undercovered.

605 This finding outlines the necessity for scientists to communicate, whenever possible,  
606 within a few hours after the occurrence of an earthquake, especially the big ones that are the  
607 most capable of catching a large audience. Of course, the need for reactive  
608 communication should not result in unpreparedness. Having a knowledge of the content and the  
609 evolution of typical earthquake news can help design typical communication tools that could  
610 be quickly adapted on a case by case basis once the event has occurred. Designing scientific  
611 messages, one should pay particular attention to counterbalance the known biases.

612 Communicating about the hazards, for instance, it would be important not to insist on  
613 including information about the magnitude but to find simple words to pass on the notions of  
614 seismic intensity [and](#) seismic crisis. [As discussed in a previous paper \(Le Texier et al., 2016\),](#)  
615 [the term of magnitude is commonly used as a synonym of intensity by the news media. But the](#)  
616 [notion of intensity is the only one allowing to introduce the notion of differential damages,](#)  
617 [which is required to understanding the importance of mitigation and preparedness \(earthquake-](#)  
618 [resistant construction, site effects, etc.\). Another topic that is absent of news media narratives](#)  
619 [is that of the location of the next event. Coulomb stress triggering theory can help answering](#)  
620 [that question, at least probabilistically speaking. It could thus be interesting to communicate on](#)  
621 [the dynamics of the seismic phenomenon, notably to help designing adequate prevention](#)  
622 [measures \(it might shake elsewhere the next time! it might shake again several times after the](#)  
623 [main shock!\).](#) About impacts, our analysis supports the statement of McClure et al. (2001): the  
624 representation of the seismic risk that is built by the press emphasizes the immediateness and  
625 hyperdestructivity of the event, occulting the real timing of such disasters: a time to anticipate

626 and get prepared, a time to protect and a time to recover and reconstruct. We agree with [authors](#)  
627 [such Lamontagne et al. \(2016\)](#) and [Wood et al. \(2009\)](#): scientific messages should encourage  
628 people to take preparedness actions and get them prepared for potential losses, describe to them  
629 the timeline of the disaster cycle and teach them ways to diminish losses.

630 Although unprecedented, we are aware that our study also has some caveats. The use of  
631 keywords to quantify themes and topics provides robust conclusions but is not completely  
632 satisfactory. We tried to get around its limitations by preselecting words from a list of the most  
633 frequently used terms. A further step is to engage with more complete techniques of text  
634 analysis combining inductive and deductive approaches. We could, for example, use machine  
635 learning methods such as word2vec (Le & Mikolov, 2014) for the simplification of the  
636 collection of keywords and the quantification of the different steps of the news coverage.  
637 However, this tool would complement but not replace the qualitative analysis of the content we  
638 undertook in this study.

639 One of our working hypotheses was to demonstrate the existence of a global framing of  
640 earthquake news and, to reach that goal, we chose to work on the international [news](#), but it  
641 would be important to undertake a similar analysis on the national and regional press as well as  
642 social media. A recent work by Jamieson and Van Belle (2019) suggests for instance that the  
643 level of development of the disaster-stricken community influences the nature of news coverage  
644 in other at-risk communities : “if an earthquake occurs in a community with a high level of  
645 development, the news coverage is much more likely to draw lessons for their community, and  
646 less likely to emphasize differences that prevent policy learning”.

647 Another interesting lead to explore would be to study the evolution of the public state of  
648 mind as they read the news. This could allow choosing more carefully which information to  
649 provide and at which time (see Wein et al., 2016, for an example).

650

## 651 **5 Conclusion**

652 “Most people do not experience disasters first-hand, but rely on mediated depictions of  
653 distant events.” (Jamieson and Van Belle, 2019). This is why it is of utmost importance to study  
654 the narratives built by the news media in reporting about distant disasters. In this paper, we  
655 explore the [news](#) media coverage of seismic events in the international [news](#) during the year  
656 2015, analyzing 320 888 news [items](#) published in English, Spanish or French by 32 RSS feeds  
657 distributed worldwide. Among the 7 136 earthquakes of magnitude 4.5+ occurring that year,  
658 three were predominantly covered: the sadly famous ‘Nepal quake’ that hit the valley of  
659 Kathmandu in April, an earthquake in Chile that shook the area of Ilapel in September, and an  
660 earthquake in Afghanistan that struck the Hindu Kush in October. We compare the duration  
661 and content of the [news](#) media coverage of these three major earthquakes with classical models  
662 of Disaster Risk Management.

663 Doing so, we demonstrate that: 1) there is a typical framing of the news about earthquakes  
664 in the international [news](#), 2) this framing introduces major biases in representation, impeding  
665 the proper appropriation of the seismic risk by the public. The news content faithfully follows  
666 the succession of phases predicted by the DRM scheme, describing the hazard before reporting  
667 on its effects and the response of the impacted communities. However, an important bias is  
668 introduced by the very short duration of coverage: only the first phases of the DRM scheme are

669 covered, while the issues of recovery, restoration, reconstruction, adaptation, mitigation and  
670 preparedness remain largely ignored. We also observed the following biases: i) The news tends  
671 to concentrate on the description of impacts and, among them, more specifically on human  
672 losses. That focus is associated with the pervasive use of sensationalistic terms describing a  
673 landscape of devastation, which may contribute to fatalistic judgments that the damage cannot  
674 be prevented. ii) The second theme of interest – the second in terms of coverage intensity but  
675 the first one in terms of timing - is that of hazards. The communication is centered on the notion  
676 of magnitude, with the concept of seismic intensity being ignored. Aftershocks can be  
677 occasionally treated as isolated events, testifying to a lack of understanding of the concept of  
678 the seismic crisis and, except for tsunamis, secondary hazards are barely mentioned. iii) The  
679 third theme of interest is that of the emergency response. The focus is made on alert and  
680 evacuations in case of tsunami warnings and on aid, search and rescue otherwise. Other issues  
681 such as safety measures, temporary housing, water or electricity cuts, etc., and longer-term  
682 issues are barely mentioned.

683 On the basis of that analysis, we discussed leads to improve the scientific communication  
684 on earthquakes. Taking the opportunity of the short window of interest that follows big  
685 earthquakes, scientists should familiarize people with the real timeline of a seismic disaster  
686 cycle... which tends to last longer than the interest of the news media.  
687

## 688 **Data and Resources**

689 This paper has benefited from the database GEOMEDIA produced and maintained by the  
690 International College of Territorial Science (<http://www.gis-cist.fr>). Earthquake parameters  
691 were obtained from the USGS Comprehensive Earthquake Catalog (ComCat), which was  
692 searched using <https://earthquake.usgs.gov/earthquakes/search/> (last accessed on November, 1<sup>th</sup>  
693 2019).  
694

## 695 **Authors contribution**

696 Conceptualization, project administration, methodology, writing – original draft: M. Devès;  
697 Writing – review & editing: all authors; Data curation and investigation: M. Devès, M. Le  
698 Texier, H. Pécout; Formal analysis: M. Le Texier, H. Pécout; Validation; M. Le Texier, M.  
699 Devès; Visualization: H. Pécout, M. Devès ; Resources: C. Grasland.

700

## 701 **Acknowledgements**

702 This paper is a contribution to the Cross-disciplinary Program *Politics of the Earth* of the  
703 Université Sorbonne Paris Cité (Université de Paris), to CRPMS and IPGP (contribution  
704 number 4031).  
705  
706



707 **References**

- 708 Adams W.C. Whose lives count? TV coverage of natural disasters. *Journal of*  
709 *Communication*, 36, 113-122, 1986
- 710 [Bauer, M. W., Howard, S., Ramos, R., Jessica, Y., Massarani, L., & Amorim, L. .Global](#)  
711 [science journalism report: working conditions & practices, professional ethos and future](#)  
712 [expectations. Science and Development Network, 2013.](#)
- 713 Blei, D. M., Ng, A. Y., and Jordan, M. I. Latent dirichlet allocation. *Journal of machine*  
714 *Learning research*, 3Jan, 993-1022, 2003
- 715 Boin, A., McConnell, A., and Hart, P. T. (Eds.). *Governing after crisis: The politics of*  
716 *investigation, accountability and learning*. Cambridge University Press. 2008
- 717 Boomgaarden, H. G., and de Vreese, C. H. Dramatic real-world events and public opinion  
718 dynamics: Media coverage and its impact on public reactions to an assassination. *International*  
719 *Journal of Public Opinion Research*, 19(3), 354-366, 2007
- 720 [Church, K. W., & Hanks, P. Word association norms, mutual information, and](#)  
721 [lexicography. Computational linguistics, 16\(1\), 22-29, 1990.](#)
- 722 [Cocco, M., Cultrera, G., Amato, A., Braun, T., Cerase, A., Margheriti, L., ... and Meletti,](#)  
723 [C. The L'Aquila trial. Geological Society, London, Special Publications, 419\(1\), 43-55, 2015.](#)
- 724 [Cottle, S. Rethinking media and disasters in a global age: What's changed and why it](#)  
725 [matters. Media, War & Conflict, vol. 7, no 1, p. 3-22, 2014](#)
- 726 Cox, R. S., Long, B. C., Jones, M. I., and Handler, R. J. Sequestering of suffering: Critical  
727 discourse analysis of natural disaster media coverage. *Journal of health psychology*, 13(4), 469-  
728 480, 2008
- 729 Cox, R. S., and Perry, K. M. E. Like a fish out of water: Reconsidering disaster recovery  
730 and the role of place and social capital in community disaster resilience. *American journal of*  
731 *community psychology*, 48(3-4), 395-411, 2011
- 732 CRED. The International Disaster Database. Centre for Research on the Epidemiology of  
733 Disasters, Brussels, Belgium (Accessed 17/4/17, <http://www.emdat.be/>), 2017
- 734 Devès, M. La question du réel: de la science à la catastrophe. *Recherches en psychanalyse*,  
735 20, 107-116, 2015
- 736 Earle, P., Guy, M., Buckmaster, R., Ostrum, C., Horvath, S. and Vaughan, A. OMG  
737 earthquake! Can Twitter improve earthquake response? *Seismological Research Letters*, 81(2),  
738 246-251, 2010
- 739 Foucault, M. *The archaeology of knowledge*, trans. AM Sheridan Smith (New York:  
740 Pantheon, 1972), 24, 1972
- 741 Gaddy, G. D., and Tanjong, E. Earthquake coverage by the Western press. *Journal of*  
742 *Communication*, 36, 105–112, 1987
- 743 Galtung, J., and Ruge, M. H. The structure of foreign news the presentation of the Congo,  
744 Cuba and Cyprus Crises in four Norwegian newspapers. *Journal of Peace Research*, 2(1), 64–  
745 90, 1965
- 746 [Grasland, C. International news flow theory revisited through a space–time interaction](#)  
747 [model: Application to a sample of 320.000 international news stories published through RSS](#)  
748 [flows by 31 daily newspapers in 2015. International Communication Gazette, 2019](#)  
749  [\(https://doi.org/10.1177/1748048518825091\)](https://doi.org/10.1177/1748048518825091)

750 Grasland, C., Lamarche-Perrin, R., Loveluck, B., and Pecout, H. International Agenda-  
751 setting, the Media and Geography: A multi-dimensional Analysis of News Flows. *L'Espace*  
752 *Géographique*, 45(1), 25–43, 2016

753 Haas, J. E., Kates, R. W., & Bowden, M. J. Reconstruction following disaster. In  
754 *Reconstruction following disaster*. US The Massachusetts Institute of Technology, 1977

755 [Harcup, T., and O'Neill, D. What is news? Galtung and Ruge revisited. \*Journalism studies\*](#)  
756 [2\(2\), 261-280, 2001](#)

757 [Harcup, T., and O'Neill, D. "What is news? News values revisited \(again\)." \*Journalism\*](#)  
758 [studies, 18\(12\), 1470-1488, 2017](#)

759 Harris, A. J. Forecast communication through the newspaper part 1: framing the forecaster.  
760 *Bulletin of Volcanology*, 77(4), 29, 2015a

761 Harris, A. J. Forecast communication through the newspaper Part 2: perceptions of  
762 uncertainty. *Bulletin of Volcanology*, 77(4), 1, 2015b

763 Hiori, O., Mikami, S., and Miyata, K. A study of mass media reporting in emergencies.  
764 *International journal of mass emergencies and disasters*, 3(1), 21-49, 1985

765 Jamieson, Thomas, and Douglas A. Van Belle. How Development Affects News Media  
766 Coverage of Earthquakes: Implications for Disaster Risk Reduction in Observing Communities.  
767 *Sustainability*, 11 (1970), 2019

768 Kates, R. W., Colten, C. E., Laska, S., and Leatherman, S. P. Reconstruction of New  
769 Orleans after Hurricane Katrina: a research perspective. *Proceedings of the national Academy*  
770 *of Sciences*, 103(40), 14653-14660, 2006

771 Kim, K., and Barnett, G. A. The determinants of international news flow: A network  
772 analysis. *Communication Research*, 23(3), 323–352, 1996

773 Koopmans, R., and Vliegthart, R. Media attention as the outcome of a diffusion  
774 process—A theoretical framework and cross-national evidence on earthquake coverage.  
775 *European Sociological Review*, 27(5), 636–653, 2010

776 Lamontagne, M., Flynn, B. and Goulet, C. Facing the communication challenges during an  
777 earthquake swarm period. *Seismological Research Letters*, 87(6), 1-5, 2016

778 Le, Q., and Mikolov, T. Distributed representations of sentences and documents. In  
779 *International Conference on Machine Learning*, 1188-1196, 2014

780 Le Texier, M., Devès, M. H., Grasland, C., and De Chabalier, J. B. Earthquakes media  
781 coverage in the digital age. *L'Espace géographique*, 45(1), 5-24, 2016

782 Lupton, D. Discourse analysis: A new methodology for understanding the ideologies of  
783 health and illness. *Australian Journal of Public Health*, 16(2), 145-150, 1992

784 McClure, J., Allen, M. W., and Walkey, F. Countering fatalism: Causal information in  
785 news reports affects judgments about earthquake damage. *Basic and Applied Social*  
786 *Psychology*, 23(2), 109-121, 2001

787 McClure, J., and Velluppillai, J. The effects of news media reports on earthquake  
788 attributions and preventability judgments: Mixed messages about the Canterbury earthquake.  
789 *Australasian Journal of Disaster and Trauma Studies*, 2013(1), 27-36, 2013

790 Östgaard, E. Factors influencing the flow of news. *Journal of Peace Research*, 2(1), 39–63,  
791 1965

792 Peterson, S. International news selection by the elite press: A case study. *Public Opinion*  
793 *Quarterly*, 45(2), 143–163, 1981

794 Uchida, Y., Kanagawa, C., Takenishi, A., Harada, A., Okawa, K., & Yabuno, H. How did  
795 the media report on the great east Japan earthquake? Objectivity and emotionality seeking in  
796 Japanese media coverage. *PloS one*, 10(5), e0125966, 2015

797 Van Belle D.A. « New York Times and Network TV news coverage of foreign disasters:  
798 the significance of the insignificant variables ». *Journalism & Mass Communication Quarterly*,  
799 t. 77, n° 1, p. 50-70, 2000

800 Searle, J. R., & Willis, S. *The construction of social reality*. Simon and Schuster, 1995

801 Segev, E. *International news flow online: Global views with local perspectives*. Peter Lang,  
802 2016

803 Simon A.F. « Television news and international earthquake relief ». *Journal of*  
804 *Communication*, 47, 3, 82-93, 1997

805 Smith, C. Reporters, news sources, and scientific intervention: the New Madrid earthquake  
806 prediction. *Public Understanding of Science*, 5, 205-216, 1996

807 Tan Y.J and Maharjan R. What googling trends tell us about public interest in earthquakes.  
808 *Seismological Research Letters*, 89(2A), 653-657, 2018

809 [Thanthathep, K. et al. Disaster Risk Reduction: Information Kit for Media, scaling-up  
810 community-based disaster risk reduction in Lao PDR \(Department of Disaster Management and  
811 Climate Change, Ministry of Natural Resources and Environment of Lao PDR & Asian Disaster  
812 Preparedness Center\). 2016](#)

813 Wein, A., Potter, S., Johal, S., Doyle, E., Becker, J. Communicating with the public during  
814 an earthquake sequence: improving communication of geoscience by coordinating roles.  
815 *Seismological Research Letters*, 87(1), 112-118, 2016

816 Wilks, D. S. Cluster analysis. In *International geophysics*, Academic press, 100, 603-616,  
817 2011

818 [Wood, M.M., Kano, M., Mileti, D.S., and Bourque, L.B., Reconceptualizing household  
819 disaster readiness: The “Get Ready” pyramid. \*Journal of Emergency Management\*, 7\(1\), 25-37,  
820 2009](#)

821 [Wood, M.M., Mileti, D.S., Kano, M., Kelley, M.M., Regan, R., and Bourque, L. B.,  
822 Communicating Actionable Risk for Terrorism and Other Hazards. \*Risk Analysis\*, 32, 601-615,  
823 2012](#)

824 Wu, H. D. Systemic determinants of international news coverage: A comparison of 38  
825 countries. *Journal of Communication*, 50(2), 110–130, 2000

826 Yoshida, H., Kobayashi, N., Honda, N., Matsuoka, H., Yamaguchi, T., Homma, H., and  
827 Tomita, H. Post-traumatic growth of children affected by the Great East Japan Earthquake and  
828 their attitudes to memorial services and media coverage. *Psychiatry and clinical neurosciences*,  
829 70(5), 193-201, 2016

830

831

832

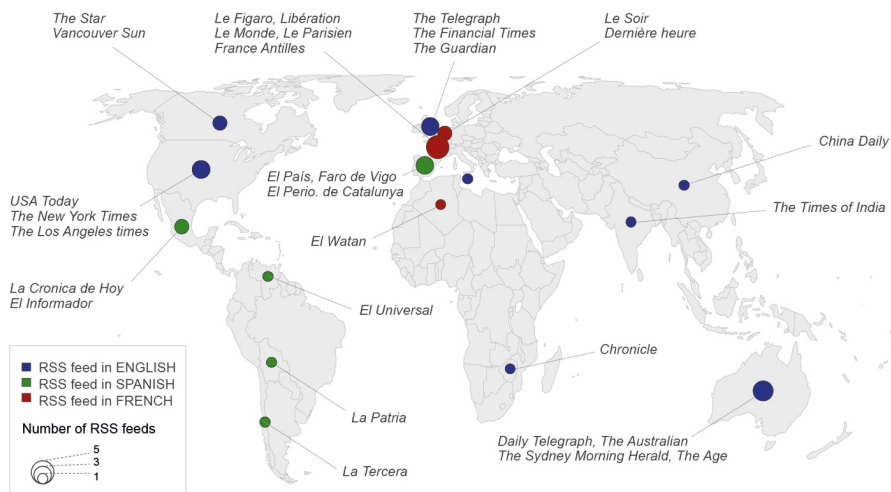

833  
834  
835  
836

**Figure 1.** Corpus of news RSS feeds used, by origin and language

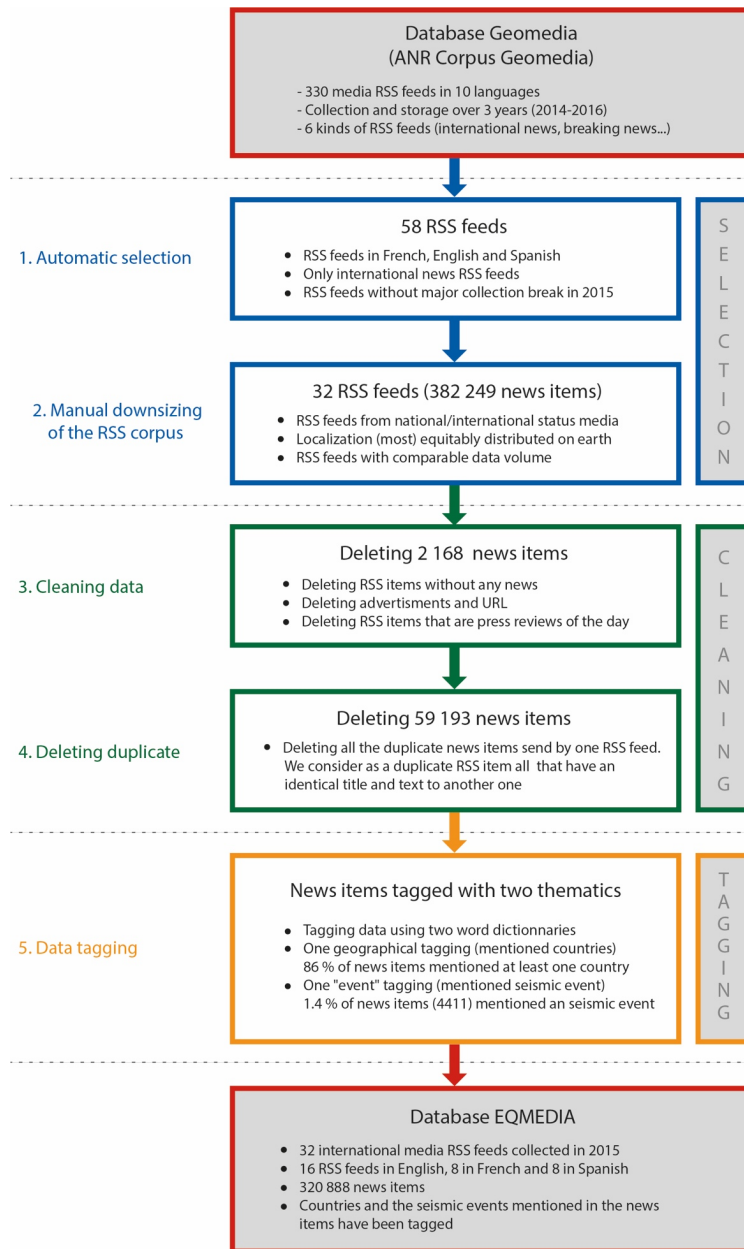

837  
838  
839  
840

**Figure 2.** Building the EQMEDIA database

841

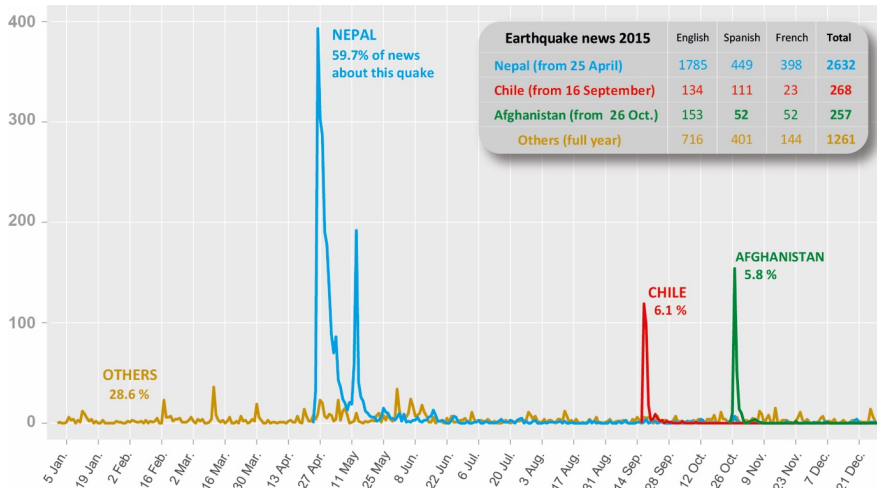

842

843 **Figure 3.** The media coverage intensity (number of news [items](#) published per day) of the year  
 844 2015 is dominated by three events: the Nepal Quake, an earthquake in the area of Ilapel, Chile  
 845 and an earthquake in the Hindu Kush, Afghanistan.

Supprimé: articles

846

847

848

849

850

851

852

853

854

855

856

857

858

859

860

861

862

863

864 **Table 1 (next page).** Discourse content dictionary. Contains the keywords used to classify [news](#)  
 865 items into categories of discourse corresponding to the main phases and topics of disaster risk  
 866 management. Keywords were identified from a list of most frequent words using different  
 867 thresholds for English, Spanish and French to balance differences in the RSS feed numbers.

| CONTENT CATEGORIES | KEYWORDS BY THEMES AND TOPICS                                                                                                                                                                                                                                                                                                                                                                                                                                                                                                                                                                                                                                                                                                                                                                                                                                                                                                                                                                                                                                                                                                                                                                                                                                                                                                                                                                                                                                                                                                                                                                                                                                        |
|--------------------|----------------------------------------------------------------------------------------------------------------------------------------------------------------------------------------------------------------------------------------------------------------------------------------------------------------------------------------------------------------------------------------------------------------------------------------------------------------------------------------------------------------------------------------------------------------------------------------------------------------------------------------------------------------------------------------------------------------------------------------------------------------------------------------------------------------------------------------------------------------------------------------------------------------------------------------------------------------------------------------------------------------------------------------------------------------------------------------------------------------------------------------------------------------------------------------------------------------------------------------------------------------------------------------------------------------------------------------------------------------------------------------------------------------------------------------------------------------------------------------------------------------------------------------------------------------------------------------------------------------------------------------------------------------------|
| <b>HAZARDS</b>     | <p><b>Magnitude</b><br/> EN: magnitude, Richter<br/> SP: grados, Richter, magnitud(es)<br/> FR: magnitude, Richter</p> <p><b>Tsunami</b><br/> EN: tsunami(s)<br/> SP: tsunami(s), maremoto(s), olas<br/> FR: tsunami(s)</p> <p><b>Aftershocks</b><br/> EN: aftershock(s)<br/> SP: aftershock(s), réplica(s)<br/> FR: aftershock(s), réplique(s)</p> <p><b>Other secondary hazards</b><br/> EN: avalanche(s), landslide(s), flood(s)/flooding<br/> SP: avalancha(s), deslizamiento(s), alud, inundacion(es)<br/> FR: glissement(s) de terrain, avalanche(s)</p>                                                                                                                                                                                                                                                                                                                                                                                                                                                                                                                                                                                                                                                                                                                                                                                                                                                                                                                                                                                                                                                                                                       |
| <b>IMPACTS</b>     | <p><b>Impacts – general</b><br/> EN: hit(s), struck, felt, shook, shak(e)(ing)(en), rocked, jolt(s)(ed), rattled, shattered, sway(ed), battered, suffered, toppling, crushed, strike, stricken, impact<br/> SP: impacto, estimacion(es), afectación, sacud(e)(ido)(ida)(idas)(ieron), golp(e)(eó)(ea), golpead(o)(os)(a)(as), azotó, azotado, sentido, se sintió, afectó, sufrieron, arrasó, temblar, asoló, castigad(o)(a)<br/> FR: frappé(e), touché(s), ressenti(e), ébranlé, secoué</p> <p><b>Human impact</b><br/> <i>Human impact – general</i><br/> EN: fatalities, casualty(y)(ies), victim(s), affected, stranded<br/> SP: balance, víctima(s), afectados, damnificados, recuento(s), saldo, contabilizado<br/> FR: bilan, victime(s), sinistrés<br/> <i>Human impact – death toll</i><br/> EN: death(s), kill(s)(ed)(ing), dead, bodies, died, deadly, claimed<br/> SP: muerto(s), muerte(s), mueren, murieron, mortal(es), fallecido(s), fallecieron, cuerpos, cadavers, decesos, mató<br/> FR: mort(s), tué(e)(s), corps, meurtrier<br/> <i>Human impact – injured</i><br/> EN: injured, wounded<br/> SP: heridos<br/> FR: blessés</p> <p><b>Material damage</b><br/> <i>Material damage – general</i><br/> EN: rubble, damage(d), collaps(e)(es)(ed) (ing), devastat(ed)(ion), destroy(ed)(ing), destruction, wreckage, debris, ravaged, ruins/ruined<br/> SP: daños, escombros, dañad(os)(as), destruid(o)(os)(as), pérdidas, destrucción, ruinas, caíd(o)(a), destruyó, destrozadas, colapso, devastó, devastadas, derrumb(e)(es)(aron)(ado)<br/> FR: dévast(é)(ée), décombres, dégâts, détruit/détruits, effondr(ée)(ées), destructions, gravats</p> |

|                                               |                                                                                                                                                                                                                                                                                                                                                                                                                                                                                                                                                                                                                                                                                                                                                                                                                                                                                                                                                                                                                                                                                                                                                                                                                                                                                                                                                                                                                                                                                                                                                                                                                                                                                                                                                                                                                                                                                                                                                                                                                                     |
|-----------------------------------------------|-------------------------------------------------------------------------------------------------------------------------------------------------------------------------------------------------------------------------------------------------------------------------------------------------------------------------------------------------------------------------------------------------------------------------------------------------------------------------------------------------------------------------------------------------------------------------------------------------------------------------------------------------------------------------------------------------------------------------------------------------------------------------------------------------------------------------------------------------------------------------------------------------------------------------------------------------------------------------------------------------------------------------------------------------------------------------------------------------------------------------------------------------------------------------------------------------------------------------------------------------------------------------------------------------------------------------------------------------------------------------------------------------------------------------------------------------------------------------------------------------------------------------------------------------------------------------------------------------------------------------------------------------------------------------------------------------------------------------------------------------------------------------------------------------------------------------------------------------------------------------------------------------------------------------------------------------------------------------------------------------------------------------------------|
|                                               | <p><i>Material damage - on buildings</i><br/> EN: homes, building(s), houses, structure(s), property<br/> SP: edificio(s), vivienda(s), edificaciones<br/> FR: maisons, bâtiments</p> <p><i>Material damage - on infrastructures</i><br/> EN, FR: no recurrent keywords were found<br/> SP: eléctricas, infraestructuras</p>                                                                                                                                                                                                                                                                                                                                                                                                                                                                                                                                                                                                                                                                                                                                                                                                                                                                                                                                                                                                                                                                                                                                                                                                                                                                                                                                                                                                                                                                                                                                                                                                                                                                                                        |
| <b>EMERGENCY RESPONSE</b>                     | <p><b>Tsunami warning</b><br/> EN: tsunami warning(s), alert(s)<br/> SP: alerta de tsunami, alarma<br/> FR: alerte</p> <p><b>Evacuation</b><br/> EN: evacuat(e)(ed)(ion)(ions), evacuees<br/> SP: evacua(d)(os)(as), evacuar, evacuación<br/> FR: evacu(ees)(er)(ation)</p> <p><b>Aid, Search &amp; Rescue</b><br/> <i>General</i><br/> EN: effort(s), response, respond, operation(s), deployed, aid, rescu(e)(es)(ed)(ing), relief, help(ed)(ing), assist(ance), helicopter(s), chopper, aircraft, support, send(s)(ing), save(d), distribut(ing)(ion), airlifted, dig(ging), dug, missing, search(ing), alive, pulled, trapped, recovered + table 2/rescuers<br/> SP: operación/operaciones, gestión, respuesta, solidaridad, crisis, apoy(o)(ar), ordenó, responder, envoi, enviado(s), reacción, ayuda, ayudar, ayudas, ayudando, rescate, rescatar, rescatan, rescatado, helicóptero(s), asistencia, socorro, attender, ofrece, aeronave, búsqued(a)(as) + table 2/rescuers<br/> FR: operation(s), répondre, secours, aide, sauver, assistance, disparu, chiens, recherchés, sans nouvelles + table 2/rescuers<br/> <i>Vital needs and supplies</i><br/> EN: food, hungry, sanitation, water, drink(ing), fuel, blankets, gasoline, suppl(y)(ies), resources, basic, vital, lack of, goods, need, needed, material, equipment<br/> SP: agua, alimentos, alimentaria, necesidad(es), comida, suministro(s)<br/> FR: de materiel, besoins</p> <p><b>Medical care</b><br/> EN: hospital(s), medical, medicine(s), disease(s), health, outbreak, epidemic(s), treatment, patients<br/> SP: hospital(es), médico(s), salud, medicinas, sanitarios<br/> FR: no recurrent keywords were found</p> <p><b>Displacement &amp; Temporary shelter</b><br/> EN: shelter(s), outdoors, sleep, sleeping, homeless, refuge, fled<br/> SP: noche al raso, albergues, tiendas de campaña, desplazados, refugio(s)<br/> FR: camps, fuir, dehors</p> <p><b>Crementation</b><br/> EN, FR: no recurrent keywords were found<br/> SP: funerarias</p> |
| <b>RECOVERY REHABILITATION RECONSTRUCTION</b> | <p><b>Recovery/Reconstruction</b><br/> EN: recover(y)(ing), return to, returned, reconstruction, rebuild(ing), reopen(s)(ed), normal</p>                                                                                                                                                                                                                                                                                                                                                                                                                                                                                                                                                                                                                                                                                                                                                                                                                                                                                                                                                                                                                                                                                                                                                                                                                                                                                                                                                                                                                                                                                                                                                                                                                                                                                                                                                                                                                                                                                            |



|                       |                                                                                                                                                                                                                                                                                                                                                                          |
|-----------------------|--------------------------------------------------------------------------------------------------------------------------------------------------------------------------------------------------------------------------------------------------------------------------------------------------------------------------------------------------------------------------|
| <b>(PREPAREDNESS)</b> | <p>SP: desescombros, reconstrucción, reconstruir, normalidad<br/>FR: reconstruction</p> <p><i>No recurrent keywords were found that unambiguously refer to Risk assessment, development and land use planning / Adaptation and mitigation measures / Education and information / Preparedness, contingency planning, consolidate preparations for next disasters</i></p> |
|-----------------------|--------------------------------------------------------------------------------------------------------------------------------------------------------------------------------------------------------------------------------------------------------------------------------------------------------------------------------------------------------------------------|

869  
870  
871  
872  
873  
874  
875

**Table 2.** Identity matrix. Contains the keywords used to quantify the presence/absence of different categories of stakeholders. Keywords were identified from a list of most frequent words using different thresholds for English, Spanish and French to balance differences in the RSS feed numbers.

| <b>CONTENT CATEGORIES</b>           | <b>KEYWORDS BY THEMES AND TOPICS</b>                                                                                                                                                                                                                                                                                                                                                                                      |
|-------------------------------------|---------------------------------------------------------------------------------------------------------------------------------------------------------------------------------------------------------------------------------------------------------------------------------------------------------------------------------------------------------------------------------------------------------------------------|
| <b>STATES</b>                       | <p>EN: nation, state(s), government(s), authorities, minister(s), ministry, foreign secretary, foreign office, president, parliament, royal rulers, embassy, European Union<br/>SP: país, nación, gobierno, autoridades, ministerio, ministro, president(a)(e), exteriores, funcionarios, gabinete, ispr, fata, europea<br/>FR: pays, gouvernement, affaires étrangères, autorités, ministère, ministre, Quai d'orsay</p> |
| <b>UN AGENCIES</b>                  | <p>EN: United Nations, UNICEF, UNESCO, World Food Programme<br/>SP: onu, naciones unidas, Programa Mundial de Alimentos, unesco, unicef<br/>FR: nations unies, onu</p>                                                                                                                                                                                                                                                    |
| <b>INTERNATIONAL AID</b>            | <p>EN: international aid, international agencies, aid agencies, humanitarian aid<br/>SP: ayuda internacional, comunidad internacional, organización no gubernamental, ong, cruz roja<br/>FR: aide internationale, croix rouge, humanitaire(s)</p>                                                                                                                                                                         |
| <b>CIVIL SECURITY &amp; DEFENSE</b> | <p>EN: police, army, military, marine(s), air force, soldiers, troops, firefighters, Gurkhas<br/>SP: ejército, policía, militares, armada, marina, soldados, Oficina Nacional de Emergencia</p>                                                                                                                                                                                                                           |
| <b>RESCUERS</b>                     | <p>EN: rescuers, rescue team(s), aid workers, rescue workers, relief workers, volunteer(s), personnel<br/>SP: equipo de rescate, equipos de rescate, servicios de emergencia, rescatistas, socorristas<br/>FR: équipe, secouristes, sauveteurs</p>                                                                                                                                                                        |
| <b>AFFECTED PEOPLE</b>              | <p><b>Directly affected ones</b><br/>EN: people, rescued, survivor(s), victims, those affected<br/>SP: persona(s), víctima(s), los afectados, damnificados, desaparecido(a)(os)(as), supervivientes, sobreviviente(s), rescatado(s)<br/>FR: victimes, survivant(s), sinistrés, rescapes, personnes</p> <p><b>Locals</b></p>                                                                                               |

|                          |                                                                                                                                                                                                                                                                                                                                                                                                                                                                                  |
|--------------------------|----------------------------------------------------------------------------------------------------------------------------------------------------------------------------------------------------------------------------------------------------------------------------------------------------------------------------------------------------------------------------------------------------------------------------------------------------------------------------------|
|                          | <p>EN: residents, locals, villagers, sherpa(s), guides, Famous locals: Ang Tshering, Bajracharya<br/>         SP: población, habitantes, guías<br/>         FR: habitants, villageois, population</p> <p><b>Vulnerable ones</b></p> <p>EN: children, child, boy, girl(s), wo(man)(men), famil(y)(ies), teenag(e)(er), teen, bab(y)(ies)<br/>         SP: niños, famili(a)(as), muj(er)(eres), jóven, bebe, anciano<br/>         FR: familles, adolescent, enfants, orphelins</p> |
| <b>'EXPERTS'</b>         | <p>EN: expert(s), US Geological Survey, specialists, scientists<br/>         SP: usgs, Centro Sismológico Nacional, especialistas, Servicio Hidrográfico y Oceanográfico de la Armada<br/>         FR: usgs, institute américain de géophysique</p>                                                                                                                                                                                                                              |
| <b>PRIVATE COMPANIES</b> | <p>EN: Google, Facebook, compan(y)(ies)<br/>         SP: google, Facebook<br/>         FR: no recurrent keywords were found</p>                                                                                                                                                                                                                                                                                                                                                  |

876  
 877  
 878

879  
880  
881

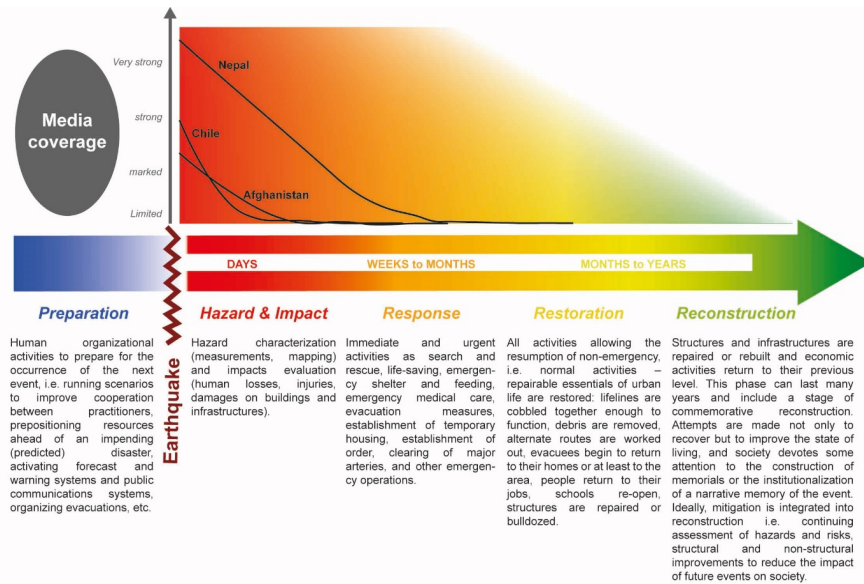

882  
883  
884  
885  
886  
887  
888  
889  
890  
891  
892

**Figure 4.** Temporal distribution of the media coverage for the three well-covered earthquakes of the year 2015. The color scale allows comparing the duration of the media coverage with the expected duration of the different phases of disaster risk management models.

|                   | Themes                 | % of earthquake news | Number of items | Subthemes              | %    | Number of items | Topics      | %    | Number of items |
|-------------------|------------------------|----------------------|-----------------|------------------------|------|-----------------|-------------|------|-----------------|
| Discourse content | Hazard                 | 45,8                 | 2020            | Tsunami                | 8,9  | 321             |             |      |                 |
|                   |                        |                      |                 | Aftershocks            | 5,8  | 254             |             |      |                 |
|                   |                        |                      |                 | Secondary hazards      | 7,8  | 343             |             |      |                 |
|                   |                        |                      |                 | Magnitude estimation   | 23,5 | 1538            |             |      |                 |
|                   | Impacts                | 76,7                 | 3384            | General impact         | 40,9 | 1802            |             |      |                 |
|                   |                        |                      |                 | Human impact           | 49,6 | 2189            | General     | 17,1 | 756             |
|                   |                        |                      |                 |                        |      |                 | Death toll  | 40,7 | 1797            |
|                   |                        |                      |                 | Material damage        | 30,8 | 1358            | Injured     | 8,9  | 393             |
|                   | General                | 26,1                 | 1150            |                        |      |                 |             |      |                 |
|                   | Response               | 45,3                 | 1996            |                        | 4,3  | 191             |             |      |                 |
|                   |                        |                      |                 | Evacuation             | 2,1  | 93              |             |      |                 |
|                   |                        |                      |                 | Aid Search Rescue      | 34,0 | 1501            | General     | 29,6 | 1306            |
|                   |                        |                      |                 |                        |      |                 | vital needs | 4,4  | 196             |
| Medical care      |                        |                      |                 | 2,2                    | 95   |                 |             |      |                 |
| Temporary shelter |                        |                      |                 | 2,7                    | 117  |                 |             |      |                 |
| Reconstruction    | 5,6                    | 246                  |                 |                        |      |                 |             |      |                 |
| Identity Matrix   | States                 | 27,7                 | 1220            |                        |      |                 |             |      |                 |
|                   | Un agencies            | 3,8                  | 168             |                        |      |                 |             |      |                 |
|                   | International Aid      | 2,5                  | 111             |                        |      |                 |             |      |                 |
|                   | Civil Security Defence | 8,0                  | 353             |                        |      |                 |             |      |                 |
|                   | Rescuers               | 7,7                  | 341             |                        |      |                 |             |      |                 |
|                   | Affected People        | 44,2                 | 1951            | Directly affected ones | 33,4 | 1475            |             |      |                 |
|                   |                        |                      |                 | Locals                 | 4,8  | 211             |             |      |                 |
|                   |                        |                      |                 | Vulnerables            | 6,0  | 265             |             |      |                 |
| Expert            | 5,4                    | 239                  |                 |                        |      |                 |             |      |                 |
| Private Companies | 1,6                    | 72                   |                 |                        |      |                 |             |      |                 |

Corpus = 320 888 news items, including 4 411 news items about earthquake (1,37%)

894

895 **Figure 5.** Percentage of news items mentioning a theme or topic. NB: One news item can  
 896 include several themes and topics.

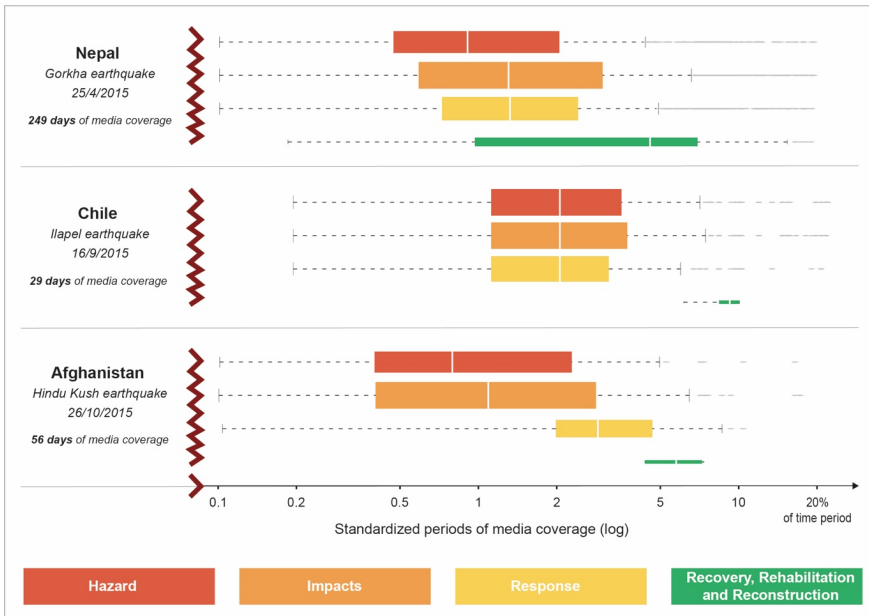

897  
898  
899  
900  
901  
902  
903

**Figure 6.** Temporal distribution of the DRM categories in the media coverage of three main earthquakes in 2015. The height of the boxes is proportional to the number of news items (for each earthquake). Box starts and ends corresponds to the first and third quartiles. The white line inside corresponds to the median.
